# Supplementary material for: Facile hydrothermal synthesis and multicolor-tunable luminescence of YPO4:Ln3+ (Ln = Eu, Tb)
Source: Royal Society of Chemistry journal article supplement (doi:10.1039/c6ra22913a), 2016-01-01
Supplement: c6ra22913a1.pdf [file c6ra22913a1.pdf]

## Supporting Information

Facile hydrothermal synthesis and multicolor-tunable luminescence of  
 $\text{YPO}_4:\text{Ln}^{3+}$  ( $\text{Ln} = \text{Eu}, \text{Tb}$ )

Hailong Xiong, Jianchao Dong, Junfeng Yang, Yali Liu, Hongbo Song, Shucai Gan\*

\* College of Chemistry, Jilin University, Changchun 130026, China  
Email: gansc@jlu.edu.cn

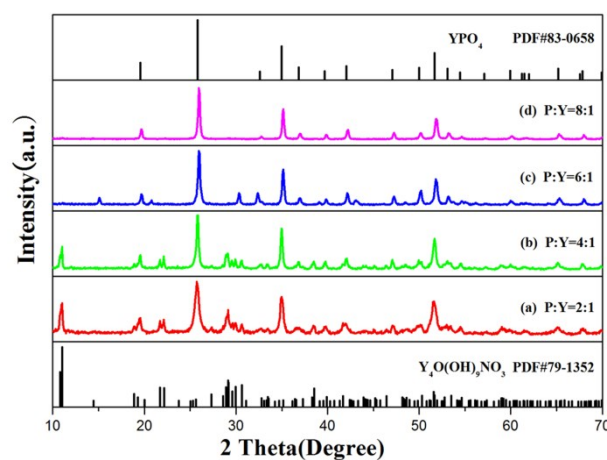

Fig. S1 XRD patterns for the as-prepared products synthesized *via* hydrothermal reaction at 180 °C for 72 h under the different molar ratio (P:Y) of 2 : 1 (a), 4 : 1 (b), 6 : 1 (c) and 8 : 1 (d).

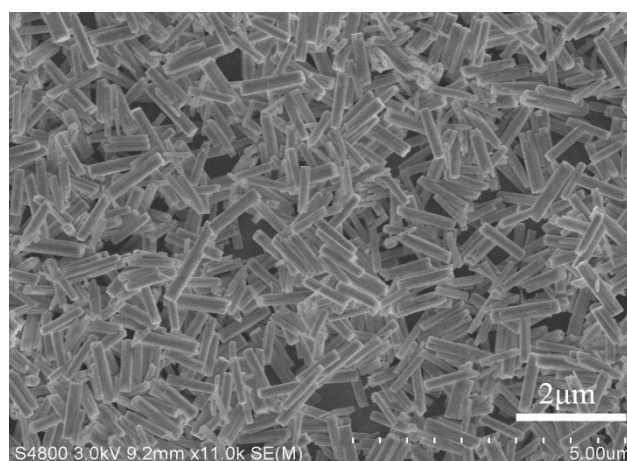

**Fig. S2** SEM image of the  $\text{Y}_4\text{O}(\text{OH})_9\text{NO}_3$  precursor.

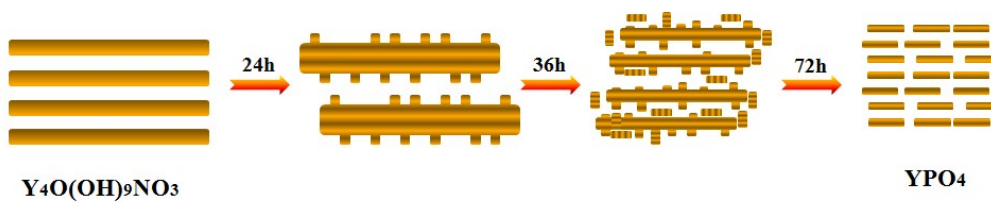

**Fig. S3** Schematic illustration of the formation process of cuboid  $YPO_4$ .
